# Supplementary material for: Retinoic acid-related orphan receptor γ directly regulates neuronal PAS domain protein 2 transcription in vivo
Source: PubMed Central journal article supplement — Nucleic Acids Res. 2011 Feb 11;39(11):4769–82. doi: 10.1093/nar/gkq1335 (PMC3113563; doi:10.1093/nar/gkq1335), 2011-02-11

## Supplementary Information and data:

### Supplementary Table S1. Sequences of primers used in QRT-PCR and ChIP assays

| Gene                   | Sense primer             | Antisense primer        |
|------------------------|--------------------------|-------------------------|
| <i>mGapdh</i>          | AGTATGACTCCACTCACGGCAAAT | GTCTCGCTCCTGGAAGATGGT   |
| <i>mNpas2</i>          | CGCAGATGTTCGAGTGGAAAG    | GTGCATTAAGGGCTGTGGAG    |
| <i>mClock</i>          | GGCGTTGTTGATTGGACTAGG    | GAATGGAGTCTCCAACACCCA   |
| <i>mUcp1</i>           | TCCTAGGGACCATCACCACC     | GCAGGCAGACCGCTGTACA     |
| <i>mGlut4</i>          | AAGATGGCCACGGAGAGAG      | GTGGGTTGTGGCAGTGAGTC    |
| <i>mFabp4</i>          | ACGACAGGAAGGTGAAGAGCAT   | TGTGGAAGTCACGCCTTTCAT   |
| <i>mMfsd2a</i>         | AAAGACACGCAAAATGCTTACCT  | AATGAAGGCACAGAGGACGTAGA |
| <i>mDio2</i>           | AGAGTGGAGGCGCATGCT       | GGCATCTAGGAGGAAGCTGTTC  |
| <i>mNpas2</i> -RORE1,2 | TTCTTGATTCTCGCCTGTCTC    | TGCCCTCTCTCCTTTTGAC     |
| <i>mNpas2</i> -896/813 | CCCTAGTGACAACCTTAGCAGGAC | CTTCCAGGTTCCGCACTAAG    |
| <i>mNpas2</i> -distal  | CGCAGATGTTCGAGTGGAAAG    | CATGGGAGGTGCCACTGCTT    |

**Supplementary Figure S1. Comparison of the circadian expression of *Clock* in several peripheral tissues from WT, *RORγ*<sup>-/-</sup> *RORα*<sup>sg/sg</sup>, and DKO mice.**

(A-H) Various tissues from WT, *RORγ*<sup>-/-</sup>, and *RORα*<sup>sg/sg</sup> mice (n=4) were isolated every 4 hr over a period of 24 hr and expression of *Clock* was analyzed by QRT-PCR. The 24-hr expression pattern was double-plotted. (I) Tissues were isolated from WT, *RORα*<sup>sg/sg</sup>, *RORγ*<sup>-/-</sup>, *RORα*<sup>sg/sg</sup>*RORγ*<sup>-/-</sup> DKO mice (n=4) at CT20. *Clock* expression in DKO, *RORα*<sup>sg/sg</sup>, and *RORγ*<sup>-/-</sup> mice was normalized to the expression in littermate WT mice. Data present mean ±SD, \* p< 0.05, \*\* p< 0.01, \*\*\* p<0.001 by ANOVA.

**Supplementary Figure S2. RORE3 plays a minor role in the activation of the *Npas2*(-1534/+81) promoter by RORs and the repression by Rev-Erbα.**

Huh-7 cells were co-transfected with the indicated p3xFlag-CMV10-ROR expression vector, pCMV-β-Gal, and a pGL4.10 reporter plasmid driven by either the wild type *Npas2*(-1534/+81) promoter or the promoter in which RORE3 was mutated (RORE3m), as shown in the Figure. 24 h later the relative luciferase reporter activities were determined. Data present mean ±SEM.

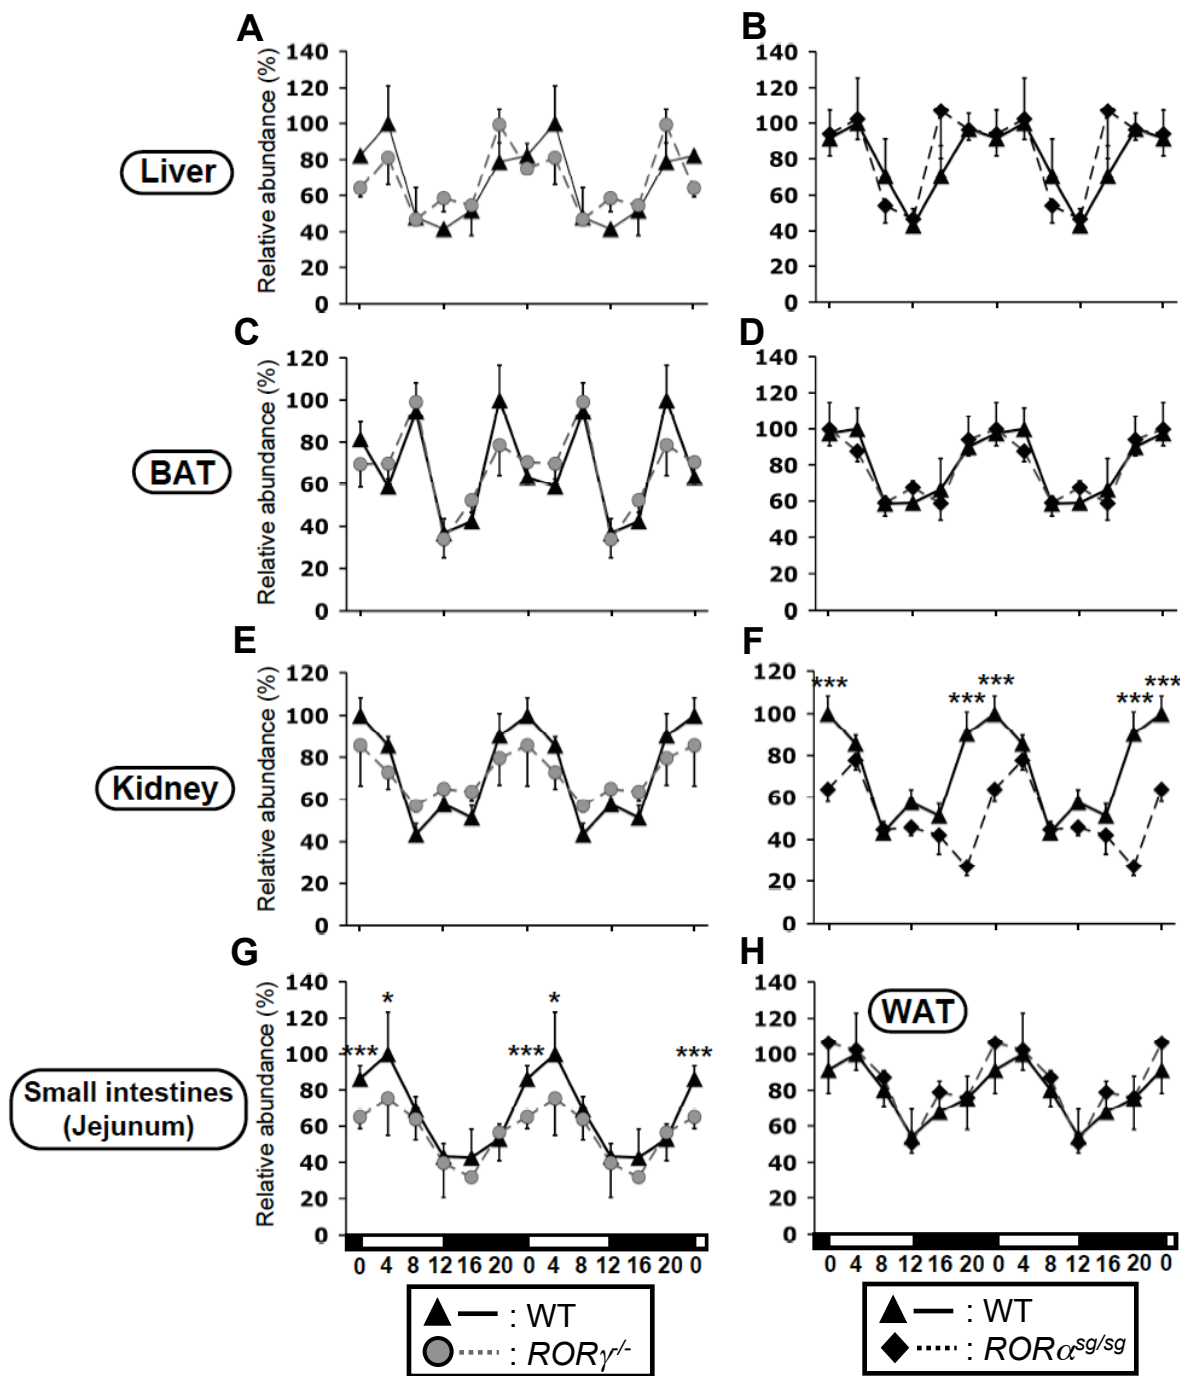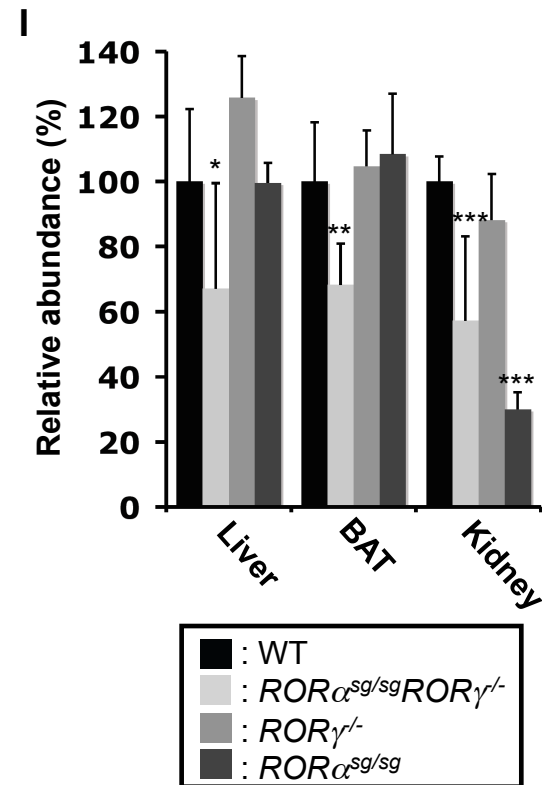

Supplementary Figure S1

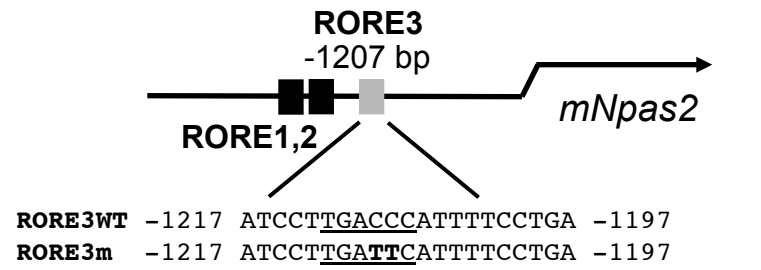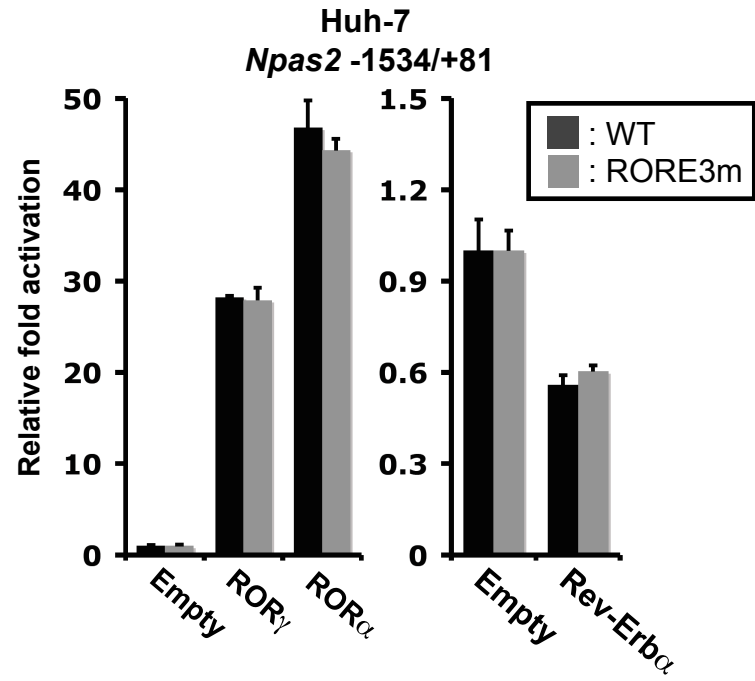

Supplement: supp_gkq1335_NAR-02292-V-2010R1_Supplementary_Info.pdf [file supp_gkq1335_NAR-02292-V-2010R1_Supplementary_Info.pdf]
